# Supplementary material for: Augmented trophoblast cell death in preeclampsia can proceed via ceramide-mediated necroptosis
Source: PubMed Central journal article supplement (PMC5386461; doi:10.1038/cddis.2016.483), 2017-02-02
Supplement: cddis2016483x2.pdf [file cddis2016483x2.pdf]

Table 1. Clinical parameters of the study population.

| <b>Clinical Parameters</b>          | <b>Preterm controls<br/>n=18</b> | <b>Early-onset preeclampsia<br/>n=37</b> | <b>Late-onset preeclampsia<br/>n=22</b> | <b>Term controls<br/>n=32</b> |
|-------------------------------------|----------------------------------|------------------------------------------|-----------------------------------------|-------------------------------|
| Gestational age at delivery (weeks) | 29.5±0.6                         | 28.5±0.5                                 | 37.3±0.4                                | 39.0±0.2                      |
| Fetal Weight (g)                    | 1439±168.4                       | 1038±96.2 *                              | 2921±257.4                              | 3467.8±141.4                  |
| Fetal Sex                           | 33.3% F, 66.7% M                 | 35.7% F, 64.3% M                         | 11.1% F, 88.8% M                        | 35% F, 65% M                  |
| Blood Pressure (mm Hg)              | S: 114.3±4.8<br>D: 69.9±3.3      | S:168.3±4.4 ***<br>D: 102.6±3.2 ***      | S:151.6±9.2 *<br>D: 94.0±5.8 *          | S:117.5±2.9<br>D: 69.5±0.6    |
| Proteinuria (g/day)                 | absent                           | 3.7±0.17                                 | 2.25±0.75                               | absent                        |
| Mode of Delivery                    | 33% CS<br>67% VD                 | 93.7% CS<br>6.3% VD                      | 77.8% CS,<br>22.2% VD                   | 94.7% CS<br>5.3% VD           |

F, female; M, male;

S, systolic; D, diastolic;

CS, caesarian section; VD, vaginal delivery.

\*p<0.05; \*\*\*p<0.001

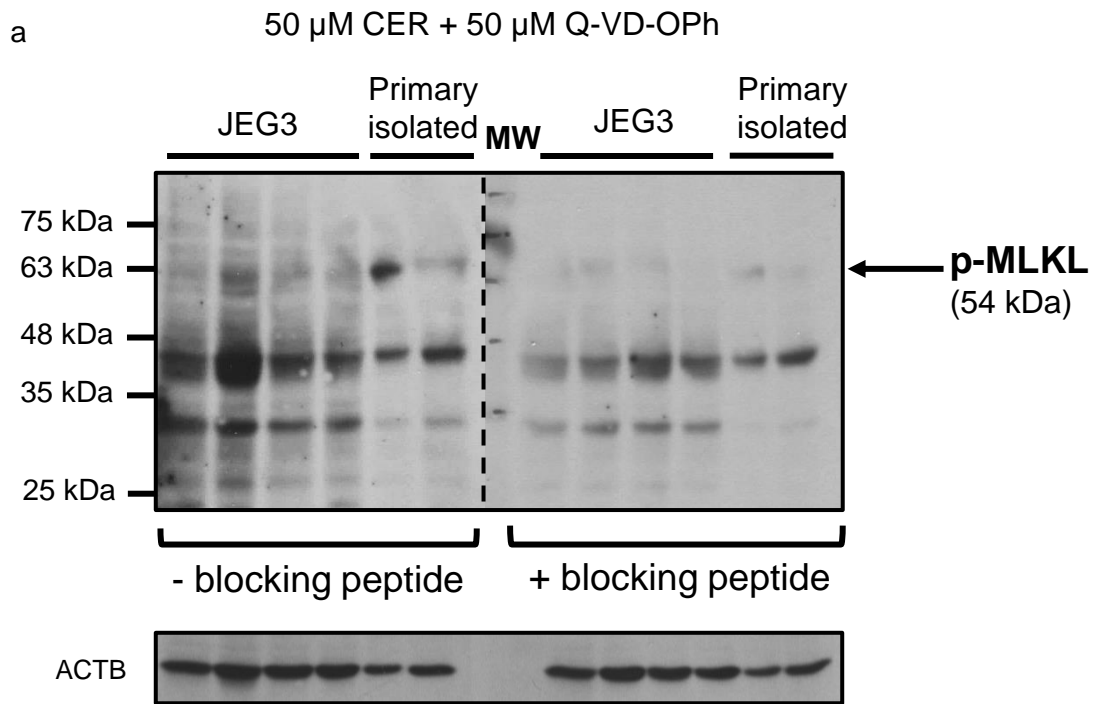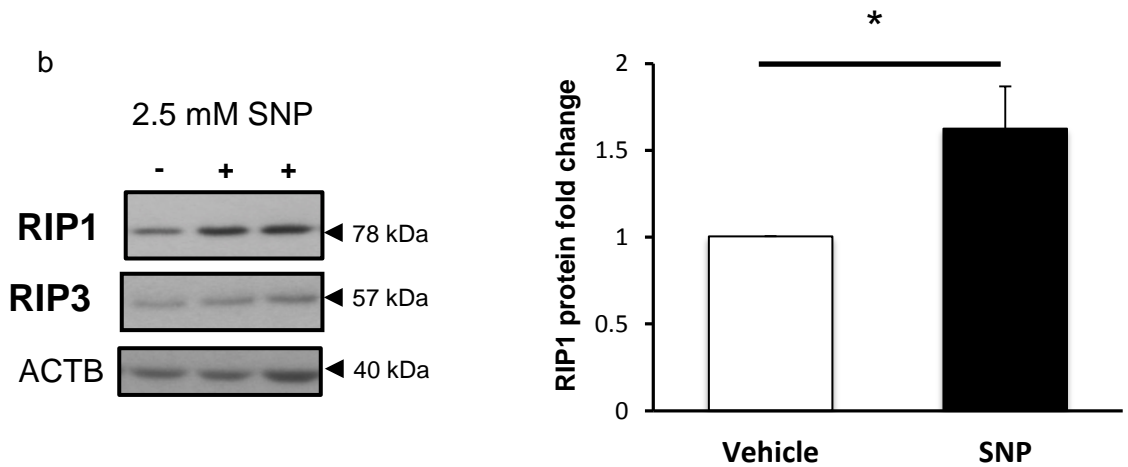

Supplementary Figure 1

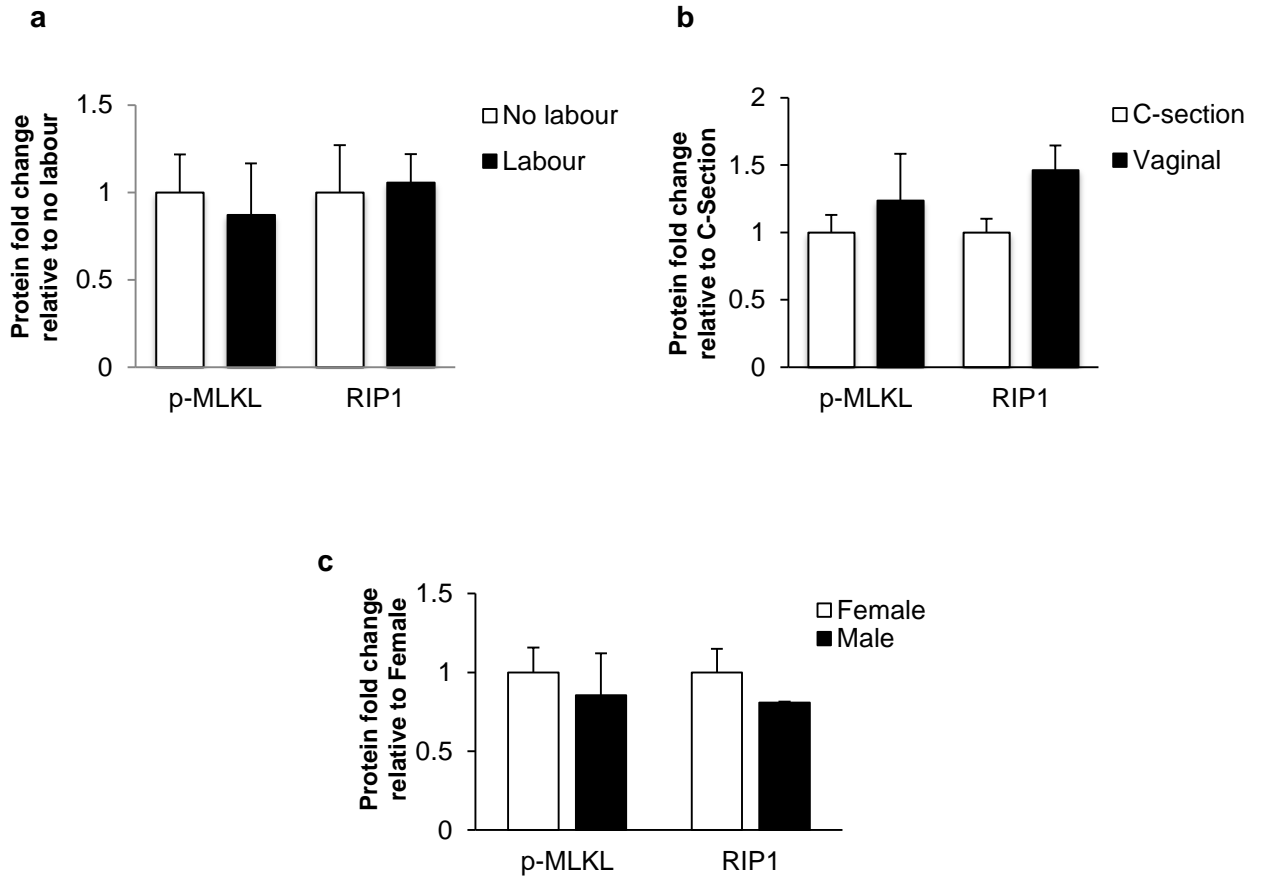

Supplementary Figure 2

Table 2. Analysis of necrotic morphological criteria in primary isolated cells by TEM

|                       | Vehicle<br>(n=12) | Ceramide<br>(n=13) | CER+Q-VD-Oph<br>(n=13) | Nec-1+CER+<br>Q-VD-Oph<br>(n=12) |
|-----------------------|-------------------|--------------------|------------------------|----------------------------------|
| Less dense cytoplasm  | 8%                | 15%                | 77%                    | 0%                               |
| Loss of membrane      | 25%               | 69%                | 77%                    | 17%                              |
| Decondensed chromatin | 8%                | 23%                | 85%                    | 0%                               |
| Swollen mitochondria  | 8%                | 8%                 | 23%                    | 17%                              |
